# Supplementary material
Source: PubMed Central journal article supplement (PMC5835750)
Supplement: AEM.02483-17_zam006188366s1.pdf [file AEM.02483-17_zam006188366s1.pdf]

## Supporting Information

# Contribution of YthA, a PspC family transcriptional regulator to *Lactococcus lactis* F44 acid tolerance and nisin yield: a transcriptomic approach

Hao Wu<sup>a,b,1</sup>, Jingui Liu<sup>a,b,1</sup>, Sen Miao<sup>a,b</sup>, Yue Zhao<sup>a,b</sup>, Hongji Zhu<sup>a</sup>, Mingqiang Qiao<sup>d</sup>, Per Erik Joakim Saris<sup>e</sup>, Jianjun Qiao<sup>a,b,c,\*</sup>

Department of Pharmaceutical Engineering, School of Chemical Engineering and Technology, Tianjin University, Tianjin, China<sup>a</sup>; Key Laboratory of Systems Bioengineering, Ministry of Education, Tianjin, China<sup>b</sup>; SynBio Research Platform, Collaborative Innovation Center of Chemical Science and Engineering, Tianjin, China<sup>c</sup>; College of Life Sciences, Nankai University, Tianjin, China<sup>d</sup>; Department of Food and Environmental Sciences, University of Helsinki, Finland<sup>e</sup>

<sup>1</sup>These authors contributed equally to this work.

\*To whom correspondence should be addressed:

Prof. Dr. Jianjun Qiao

Department of Pharmaceutical Engineering, School of Chemical Engineering and Technology, Tianjin University, Tianjin, China.

E-mail: [jianjunq@tju.edu.cn](mailto:jianjunq@tju.edu.cn).

## Contents

### 1. Table S1

### 2. Table S2

**Table S1** Significantly changed genes in FythA in other pathways

| <b>Gene name</b>                                              | <b>Log2 Ratio*</b> | <b>Description</b>                                                                 |
|---------------------------------------------------------------|--------------------|------------------------------------------------------------------------------------|
| <b><i>Translation, ribosomal structure and biogenesis</i></b> |                    |                                                                                    |
| <i>cysS</i>                                                   | 2.13               | cysteinyl-tRNA synthase                                                            |
| <i>asnC</i>                                                   | 2.01               | asparaginyl-tRNA synthase                                                          |
| <i>argS</i>                                                   | 1.64               | arginyl-tRNA synthetase                                                            |
| <i>trpS</i>                                                   | 1.54               | tryptophanyl-tRNA synthase                                                         |
| <i>lysS1</i>                                                  | 1.52               | lysyl-tRNA synthetase                                                              |
| <i>ylgC</i>                                                   | 3.49               | RNA methyltransferase                                                              |
| <i>rpmG3</i>                                                  | 2.85               | 50S ribosomal protein L33                                                          |
| <i>rpsN2</i>                                                  | 2.55               | 30S ribosomal protein S14                                                          |
| <b><i>Signal transduction mechanisms</i></b>                  |                    |                                                                                    |
| <i>kdpD</i>                                                   | 2.08               | histidine kinase                                                                   |
| <i>kdpE</i>                                                   | 1.80               | PhoP family transcriptional regulator                                              |
| <i>tcsK7</i>                                                  | 1.88               | histidine kinase                                                                   |
| <i>tcsR7</i>                                                  | 1.82               | two-component system regulator                                                     |
| <i>yheB</i>                                                   | 1.64               | oligoribonuclease                                                                  |
| <i>lepA</i>                                                   | 1.81               | GTP-binding protein LepA                                                           |
| <i>radA</i>                                                   | 1.58               | DNA repair protein RadA                                                            |
| <i>cstA</i>                                                   | -2.0               | carbon starvation protein CstA                                                     |
| <i>uspA2</i>                                                  | -1.5               | universal stress protein A                                                         |
| <i>yahB</i>                                                   | -1.5               | universal stress protein A                                                         |
| <i>yjaB</i>                                                   | -1.5               | universal stress protein family                                                    |
| <b><i>Transcription</i></b>                                   |                    |                                                                                    |
| <i>argR</i>                                                   | 1.62               | arginine catabolic regulator                                                       |
| <i>scrR</i>                                                   | 2.79               | LacI family transcriptional regulator                                              |
| <i>yebF</i>                                                   | 2.82               | RpiR family transcriptional regulator, glv operon transcriptional regulator        |
| <i>yfdD</i>                                                   | 2.83               | regulatory protein spx                                                             |
| <i>ybjK</i>                                                   | 2.03               | PadR family transcriptional regulator, regulatory protein PadR                     |
| <i>yfdC</i>                                                   | 1.89               | regulatory protein spx                                                             |
| <i>rex</i>                                                    | 1.81               | redox-sensing transcriptional repressor                                            |
| <i>rlrG</i>                                                   | 1.68               | LysR family transcriptional regulator, hydrogen peroxide-inducible genes activator |
| <i>rcfB</i>                                                   | 2.03               | Crp family transcriptional regulator                                               |
| <i>zitR</i>                                                   | 1.55               | zinc transport transcription regulator                                             |
| <i>yohC</i>                                                   | -3.02              | transcription regulator                                                            |
| <i>ysgA</i>                                                   | -2.01              | transcriptional regulator                                                          |
| <i>rarA</i>                                                   | -1.53              | transcriptional regulator                                                          |
| <i>tcsR8</i>                                                  | -2.29              | Two-component system, response regulator, LytTR family                             |
| <i>hrcA</i>                                                   | -2.4               | heat-inducible transcription repressor HrcA                                        |

---

**Carbohydrate transport and metabolism**

|             |      |                                                     |
|-------------|------|-----------------------------------------------------|
| <i>scrB</i> | 2.49 | sucrose-6-phosphate hydrolase                       |
| <i>pgi</i>  | 1.96 | glucose-6-phosphate isomerase                       |
| <i>yrjI</i> | 1.82 | phosphoglycerate mutase                             |
| <i>gapA</i> | -7.8 | glyceraldehyde 3-phosphate dehydrogenase            |
| <i>enoA</i> | -1.7 | enolase                                             |
| <i>glk</i>  | -1.9 | glucokinase                                         |
| <i>mtsA</i> | 3.71 | manganese ABC transporter substrate-binding protein |
| <i>mtsB</i> | 2.70 | manganese ABC transporter ATP binding protein       |
| <i>mtsC</i> | 3.29 | membrane protein                                    |

**Inorganic ion transport and metabolism**

|             |      |                                          |
|-------------|------|------------------------------------------|
| <i>era</i>  | 1.80 | GTPase Era                               |
| <i>ybaB</i> | 1.71 | heme ABC transporter ATP-binding protein |

**Secretion**

|              |      |                                     |
|--------------|------|-------------------------------------|
| <i>secE</i>  | 3.00 | preprotein translocase subunit SecE |
| <i>secY</i>  | 1.86 | preprotein translocase subunit SecY |
| <i>secA2</i> | 1.72 | preprotein translocase subunit SecA |
| <i>secA1</i> | 1.55 | preprotein translocase subunit SecA |

**Chaperones**

|              |      |                           |
|--------------|------|---------------------------|
| <i>grpE</i>  | -3.1 | molecular chaperone GrpE  |
| <i>groES</i> | -2.0 | molecular chaperone GroES |
| <i>groEL</i> | -1.9 | chaperonin GroEL          |
| <i>dnaK</i>  | -2.7 | molecular chaperone DnaK  |

---

\*represents fold change in log<sub>2</sub>-scale

**Table S2** Sequence of the putative promoter regions used to motif scanning

| Operon           | Gene name   | Log2 Ratio * | The putative promoter regions                                                                                                                                                                                                                                                                                                                                                                                                                                                                                                                                                       |
|------------------|-------------|--------------|-------------------------------------------------------------------------------------------------------------------------------------------------------------------------------------------------------------------------------------------------------------------------------------------------------------------------------------------------------------------------------------------------------------------------------------------------------------------------------------------------------------------------------------------------------------------------------------|
| <i>argGH</i>     | <i>argG</i> | 8.62         | ATAAACTTTCAATTTTATTATATTTATAACTACTACCTTGCAAAAAGTGGTAGTTTTTTTCATCAACGAAAATT<br>TTTTTGAATAAAAAAACCTCCTGACGTAATCTTATACAGTCAGGAGGAAAAGGAGTAAGCGTATTGGTCACT<br>GGATTTTCTATAATTTTTTCAAATAGGGTAGAAAAATCTATTTATAAAAGGAGTCAAGGGGATTTGAACCCCT<br>GCGCCGCTTTACACGGTTCGACGGATTTGAGTCCGCTGCATTACCACTCTGCCATGGCTCCACTCCTTTATC<br>TAAATTAATTATATCACAGTTGATTCTCTTCTTGAAATAATATGAAATTGCTAGAATGAAAATAAACGCATATT<br>TATACAAAAATGTTGACAAATGAATAAATATGCTGTACAATTGCATTTATATTAATTTGAAAGAAGAAAAATGA<br>TGGGAAACAAAAAAATTGCTTTGGCATAATCGGGTGGATTGGATACAAGTGTGCTGTAATAATGGTTGACTG<br>ATAAAGGATTTGACGTCATTGCTG |
|                  | <i>argH</i> | 7.67         |                                                                                                                                                                                                                                                                                                                                                                                                                                                                                                                                                                                     |
| <i>gltPQ</i>     | <i>gltP</i> | 6.32         | CAGAATAAAAAAACTCCAATTATGGAGTTTTTATTTATTTTCAATTAATTATTATACATTAATTGTTGTATTTTTA<br>TACTTTTTATATTATAATTATGCTATTGTTTTTATAAAAATAGAAATTATAAACAGAAAAGAGAAAATATGAA<br>CTTTGATTTTTTACCGAAATATCTGCCCTATTTTAATGACGGGA                                                                                                                                                                                                                                                                                                                                                                           |
|                  | <i>gltQ</i> | 4.45         |                                                                                                                                                                                                                                                                                                                                                                                                                                                                                                                                                                                     |
| <i>pyrR</i>      | <i>pyrR</i> | 4.41         | AAAATAATTTTTGACAAGTGGCGAGAACTTTGCTATAATCTATCTAACCTTTAAGATTGTCCAGAGAGGCAGG<br>CAAGGTCAGAAATTAATAATGTAATAATATGATGGATACTGTCCATTTTCTGATACCTACCTGCATTCTTTTTG<br>AGTGCAGGTTTTTTGTATGTTAATGGACAACCTTAGAAATGGAAGCTAAATCGCTAAATGAAAGATTTGTTAGT<br>TACTGACCAATTGATCATCAAGAATGAAAGGAGCCACAATGGCTAGAAAAGAAATTATTGACGAAATCACA<br>ATGAAACGTGCAATTACACGTATCACTTACGAGATTATTGAACGTAATAAAG                                                                                                                                                                                                            |
| <i>gltS-argE</i> | <i>gltS</i> | 3.58         | TTAATAATTAATAAAAAATTCCTCATTGAGTGAATTTTTATTTTGAATCAAGTATAAAAGTACAGTTTTTATCTA<br>AAAAICTTTGTTTATTAATAATTATAATATAAATATGCAAAAATCTTGACAAAATAATTTTAAAATGTATAATT<br>ATACTTATTCTATTTATAAAAGAGGTTTAAAGGATGAACAAGAAGATGAAAAAATTAGCATTGGGAATGGTCGG<br>TTTGGCCGCAGTAGCAACATTAGCAGCTTGTGGAAATGGAAAATCGGCTACTAATCAAGTGGATAAAGTAA<br>GACTTGCAAATCTGGCTCAAGTTTGTAACTAATAACAATATAACTTTTAACTAGTCCAGAGAGGGCTAG<br>CAAGGTTGAAATCAGGAAAAATTGATTCTATTTTTACTGACAGGATTTTCTGTGTCAGTAAAAGTGAATTTGTTT<br>TGATACTTTTTACACTTGCTAGGATTCTTGCAAGTGTTTTTTATTGCTGACAACCTACCAGGATTGGACTGCA                             |
|                  | <i>argE</i> | 3.45         |                                                                                                                                                                                                                                                                                                                                                                                                                                                                                                                                                                                     |
| <i>pyrE</i>      | <i>pyrE</i> | 3.30         |                                                                                                                                                                                                                                                                                                                                                                                                                                                                                                                                                                                     |

|                  |             |      |                                                                                                                                                                                                                                                                                                                                                                                                                                                                                                  |
|------------------|-------------|------|--------------------------------------------------------------------------------------------------------------------------------------------------------------------------------------------------------------------------------------------------------------------------------------------------------------------------------------------------------------------------------------------------------------------------------------------------------------------------------------------------|
|                  |             |      | CGTTATCTATACTCGCTACCGTAGTTCTGTCAGTTCAATATGACCAAAGGGAATTATTGAATCGGTAGAAAA<br>TGAAGTGTGAGCTTTGCTGATGGTTCTGTCAGTAACTAGAAGGAGAAATTATGTCAATATCAAAGCCATT<br>GCTGCAGATTTATTAGAAATTAAGCGGTCAGTCTTTACCAAGTCAACCTTTTACTTGGGCTTCAGGAATTA<br>AGTCGC                                                                                                                                                                                                                                                          |
| <i>pyrB-carA</i> | <i>pyrB</i> | 3.29 | AAGATTCAAATTACTGACAGAATCGTCAGTAATTAAGGAAAGTGAACCTATAACTGATAGAAATCCTATCG<br>AGATTTCCATCAGTAGATAAAAATTTGTCAGTTTACTGACAAAACAATCAAATATATTGTCAATAAACTGT<br>TGTGACAGAGAGCACACAGTCAGGGTAAAGGAGACCTCATGTGTCAGTAAAAATGGATTAGTTCAACTCGAA<br>AACCTCACAAGTATGGAAAAATTGAGTGTGATGAAGTCATGGGACTTATCAAAGAGCCTCAGCTT                                                                                                                                                                                              |
|                  | <i>carA</i> | 3.29 |                                                                                                                                                                                                                                                                                                                                                                                                                                                                                                  |
| <i>pyrZD</i>     | <i>pyrZ</i> | 2.89 | AAAAATCTTTGACGAATGACACTTTTTTCGTTATAATTTTTAAAACCTTAACTAAGTCCAGAGAGGCTTGC<br>AAGGATACGGAAAATTTAATTTGGTTTACTGACAGCTTAAAGATGAACCTTTTTTAGCGCATTTATTCTGTGAG<br>TAAATTACCAGTTTTTTAGTACACTTGTAAAGTTCTCTTACAAGTGTTTTTTTGTGTCAATTAAGAGTTGCCAG<br>TAAATCTGAACTTTCTGTGTCAGTAAAATGCGATTAACATGAGCATTTTATCGATAAATAAAGAAGGTTTCAGTA<br>AGCTGTAGCTTCTGTCCGAATAAAGAATGGAGAAATAATGCCTAAGTTACAAGAGATGATGACGATTGTGAG<br>CCAACGTGAGGTTGCTTCTAATATTTTCGAGATGGTTCTTAAAGGAGAGCTAGTAGAAGAGATGG                              |
|                  | <i>pyrD</i> | 3.22 |                                                                                                                                                                                                                                                                                                                                                                                                                                                                                                  |
| <i>aroH</i>      | <i>aroH</i> | 3.16 | TACATAATAAAATTTATGTAAGAAAGAAATTTGAAATAAAATTAAGAAAAATAGATAAATAATTGACAAATC<br>AAAAAATTTAATTATACTAACTAATAATATTAATATCGAGGTTCCAAAATGATTAACAACCTTTAAAAAATTT<br>TATTTTTCTTTATGAATGATCCACATTAGTTTTTGGCTAATAAAATGTGGGTCCTCTTTGATGTTTCGTTAATCA<br>TCTAGGGGATAAAGAAGACGTCCCCTGGGACGTCTTTTTTTATTATAAAGGAGGCACATAAAAAGTAAAATA<br>GAAAAAATTTATTGCAAGTAAAATATTATTAAGTATTTTACTAAAAAATATAGAAAAAAGGTAAAAGATGA<br>CTTTTAAAGAAGTCAAGTAAACAAATTAACATTAAGATGTAAGAGCTAAATCATTAAATGATGAGCAAC<br>GAGAAAAGAAAGAAAAACGTGATA |
| <i>pfs</i>       | <i>pfs</i>  | 3.19 | AGAGTAAAAAGATTAGAAAAAGGTAAAAAATGAAAATAGGAATTATTTGTGCGATGGATGAAGAAATTC<br>GCATACTTGTGAAAACCTTAGAAAATGCAGAAAACATACTCGTCATGGTTTAGTTTTTC                                                                                                                                                                                                                                                                                                                                                             |
| <i>epsGH</i>     | <i>epsG</i> | 2.86 | GAGGAACTAATAGATGAAAATTGCAGTTTTGTTATCAACATTTAATGGAGAAAAGTATCTGAAGGAACAAAT                                                                                                                                                                                                                                                                                                                                                                                                                         |
|                  | <i>epsH</i> | 3.01 | TGAAAGTATCTTATCTCAGTCACATAAAGATTTAATATTAT                                                                                                                                                                                                                                                                                                                                                                                                                                                        |
| <i>ylgC</i>      | <i>ylgC</i> | 3.49 | AGCAACCCCTCTCATTGATTTTTACTTTTACTATTATAGCAAATTTTTGCTGTTTTCGCTTTGACAAGTTTGATA                                                                                                                                                                                                                                                                                                                                                                                                                      |

|                  |             |       |                                                                                                                                                                                                                                                                                                                                                                                                                                                           |
|------------------|-------------|-------|-----------------------------------------------------------------------------------------------------------------------------------------------------------------------------------------------------------------------------------------------------------------------------------------------------------------------------------------------------------------------------------------------------------------------------------------------------------|
|                  |             |       | TTGGTCACTCATTTTTAAAAATAATTTCTTTTTTATCAAAAAAATTTAGTTTTCTCTTTACAAAATACAAAAG<br>AAGTGGTATGATATCAATTATATTAATTTGTTTTCAATCTTTCCTGTTATGATTAAGCAAATTAGTCCCCCACT<br>AGACTTCTTGCTGAGATTGACTCCGAGGGGTCTAGTTTTTTTTGTTTTTACTTTAATTAATTTACTGACAGCTC<br>TTCTGCTTATGGTAAAATGTTCTTAAATAATTGCATTTTACTCATAGATTTTTTGATAAGGCTGTCAGTAAAATT<br>TTTGTTATTAAGAAAGTGTATTTTCATGAATCATATTGCTCTTTTTGAACCTCGTATTCATTTCAATACAGGAAAT<br>ATCGCCCGCACTTGTGCGGCTACTAATACCGTTTTACATTTAATTGAAC |
|                  | <i>mtsA</i> | 3.71  | ATTCTTTTCCTCCTTGTGTATATGAAAACGCTATCTAAATATTTCTTACTTGAAGTATAACAAATAATAGTGTAGG<br>AATCCAAACTTATGACTTAAACTTTTTGAGAATAAATTCTGGAATTTAGTATTGAAAGAAAAGTGGTGTAGTTT<br>TCAAATATATTAATAATATTAATAAATAAATAGCTAGTGCAAATATATTGATTTAATTTTTAGGTTCATGCTATAA<br>TCGTGAGAAAGGATTAATTAGTTTTGATTTACTATCATAAGGAGAAAAACAATGATAAATACTAAGAATTTAAA<br>TGTATTCTATAATGAAAATAAAGTCCTGAAAGATATCAACTAGAAGTTATACCTGGGAGAATCACTGGTATTA<br>TCG                                              |
| <i>mtsBCA</i>    | <i>mtsB</i> | 2.70  |                                                                                                                                                                                                                                                                                                                                                                                                                                                           |
|                  | <i>mtsC</i> | 3,29  |                                                                                                                                                                                                                                                                                                                                                                                                                                                           |
|                  | <i>hrcA</i> | -2.42 | ATGAAATTAGCACTCTAATAAAAAGAGTGCTAATTTTTATGTCTTTTTGCTTGACAAGGTATAAACAAAGGGT<br>TATAATCAATTTGTTAGCACTTAGAGATGAAGAGTGCTAAAACAGAAAAAAGCTTGATAGATACTAAACAGAA<br>GTCAAAGCTCAAGAAATTTTTGAGCTTGCGAAAGAAGTTTTGCAAACCTTCTTATCTGTGGAGAAAGGAG<br>TAGTCATGATTACAGAACGTCAAAGACAAATTTTAAATTTGATTGTTTTCTTTATGCCAAAGAGCATACGCC<br>AATCGGTTCAAAGTCGCTCCTTGATAGTATTC                                                                                                          |
| <i>hrcA-grpE</i> | <i>grpE</i> | -3.1  |                                                                                                                                                                                                                                                                                                                                                                                                                                                           |
|                  | <i>dnaK</i> | -2.77 | ATTAAAAAATAAATTGACCGCAAAGTCTTTAAACTATTCATAAGTAATAAGAAATAAAGGAGATTTAAAATAT<br>GTCTAAAATTATCGGTATTGACCTTGGTACAACAACTCAGCAGTAGCAGTTCTTGAAGGAAGTGAATCAAAA<br>AATTATTCAAATCCAGAAGGAAATC                                                                                                                                                                                                                                                                        |
|                  | <i>gapA</i> | -7.86 | TAGGGTAAAAAAGTAGTATCATTATATTAGAGATAAGAGATATCTCTAATAGCTATAATTATTTATTTCTATTAT<br>AGCAAAAAAAGAGAAGAATCTCATCATCTAAATAAAAAAACGGAGGACTACATCATGGTAGTTAAAGTTGG<br>TATTAACGGTTTTGGTCGTATTGGACGTTTGGCATTACGTCGAATTCGAAGGAGTTGAAGTTGC<br>GCATATCAACG                                                                                                                                                                                                                 |

\*represents fold change in log<sub>2</sub>-scale
